# Supplementary material
Source: Springer Nature journal article supplement (https://www.springermedizin.de/resource/supplementary/13054_2011_9827_MOESM7_ESM.pdf/9706958)

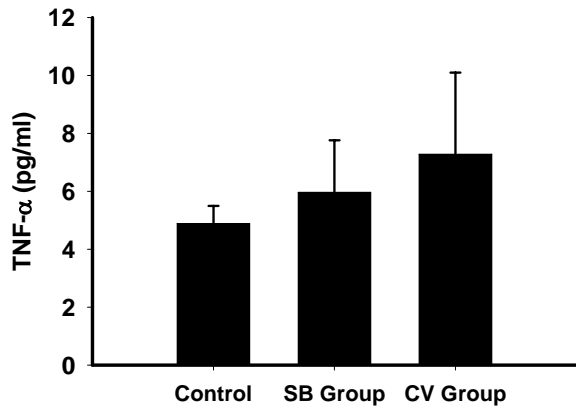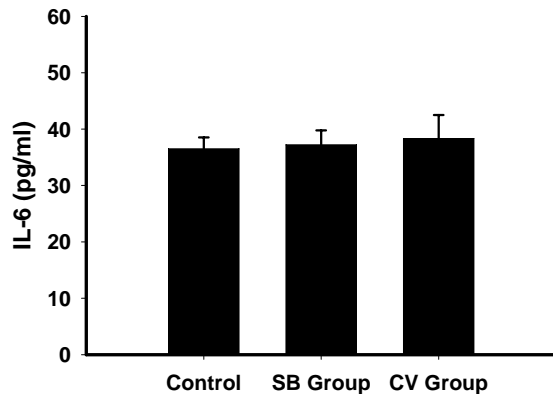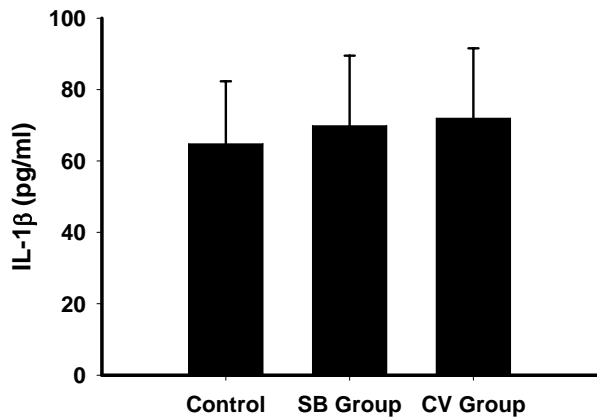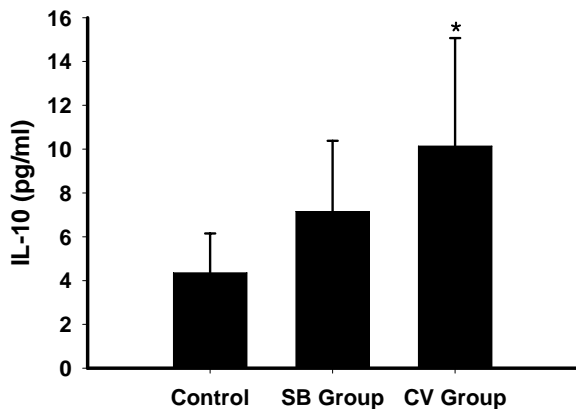

Supplement: MOESM7 [file 9706958]
